# Supplementary material
Source: ML conference proceedings conference paper supplement (https://proceedings.mlr.press/v119/chen20v.html)
Supplement: Supplementary file [file chen20v-supp.pdf]

## A. Proofs

### A.1. Proof of Theorem 2

*Proof.* For simplicity, we assume the signal vector  $\mathbf{x}$  to be non-negative. Note that we can convert  $\mathbf{x}$  into a non-negative input layer  $\mathbf{H}^{(0)}$  by a linear transformation. We consider a weaker version of GCNII by fixing  $\alpha_\ell = 0.5$  and fixing the weight matrix  $(1 - \beta_\ell)\mathbf{I}_n + \beta_\ell\mathbf{W}^{(\ell)}$  to be  $\gamma_\ell\mathbf{I}_n$ , where  $\gamma_\ell$  is a learnable parameter. We have

$$\mathbf{H}^{(\ell+1)} = \sigma\left(\tilde{\mathbf{D}}^{-1/2}\tilde{\mathbf{A}}\tilde{\mathbf{D}}^{-1/2}\left(\mathbf{H}^{(\ell)} + \mathbf{x}\right)\gamma_\ell\mathbf{I}_n\right).$$

Since the input feature  $\mathbf{x}$  is non-negative, we can remove the ReLU operation:

$$\begin{aligned}\mathbf{H}^{(\ell+1)} &= \gamma_\ell\tilde{\mathbf{D}}^{-1/2}\tilde{\mathbf{A}}\tilde{\mathbf{D}}^{-1/2}\left(\mathbf{H}^{(\ell)} + \mathbf{x}\right) \\ &= \gamma_\ell\left(\left(\mathbf{I}_n - \tilde{\mathbf{L}}\right) \cdot \left(\mathbf{H}^{(\ell)} + \mathbf{x}\right)\right).\end{aligned}$$

Consequently, we can express the final representation as

$$\mathbf{H}^{(K-1)} = \left(\sum_{\ell=0}^{K-1} \left(\prod_{k=K-\ell-1}^{K-1} \gamma_k\right) \left(\mathbf{I}_n - \tilde{\mathbf{L}}\right)^\ell\right) \mathbf{x}. \quad (8)$$

On the other hand, a polynomial filter of graph  $\tilde{G}$  can be expressed as

$$\begin{aligned}\left(\sum_{k=0}^{K-1} \theta_k \tilde{\mathbf{L}}^k\right) \mathbf{x} &= \left(\sum_{i=0}^k \theta_k \left(\mathbf{I}_n - \left(\mathbf{I}_n - \tilde{\mathbf{L}}\right)\right)^k\right) \mathbf{x} \\ &= \left(\sum_{k=0}^{K-1} \theta_k \left(\sum_{\ell=0}^k (-1)^\ell \binom{k}{\ell} \left(\mathbf{I}_n - \tilde{\mathbf{L}}\right)^\ell\right)\right) \mathbf{x}.\end{aligned}$$

Switching the order of summation follows that a  $K$ -order polynomial filter  $\left(\sum_{k=0}^{K-1} \theta_k \tilde{\mathbf{L}}^k\right) \mathbf{x}$  can be expressed as

$$\left(\sum_{k=0}^{K-1} \theta_k \tilde{\mathbf{L}}^k\right) \mathbf{x} = \left(\sum_{\ell=0}^{K-1} \left(\sum_{k=\ell}^{K-1} \theta_k (-1)^\ell \binom{k}{\ell}\right) \left(\mathbf{I}_n - \tilde{\mathbf{L}}\right)^\ell\right) \mathbf{x}. \quad (9)$$

To show that GCNII can express an arbitrary  $K$ -order polynomial filter, we need to prove that there exists a solution  $\gamma_\ell$ ,  $\ell = 0, \dots, K-1$  such that the corresponding coefficients of  $\left(\mathbf{I}_n - \tilde{\mathbf{L}}\right)^\ell$  in equations (8) and (9) are equivalent. More precisely, we need to show the following equation system

$$\prod_{k=K-\ell-1}^{K-1} \gamma_k = \sum_{k=\ell}^{K-1} \theta_k (-1)^\ell \binom{k}{\ell}, \quad k = 0, \dots, K-1,$$

has a solution  $\gamma_\ell$ ,  $\ell = 0, \dots, K-1$ . Since the left-hand side is a partial product of  $\gamma_k$  from  $K-\ell-1$  to  $K-1$ , we

can solve the equation system by

$$\gamma_{K-\ell-1} = \frac{\sum_{k=\ell}^{K-1} \theta_k (-1)^\ell \binom{k}{\ell}}{\sum_{k=\ell-1}^{K-1} \theta_k (-1)^{\ell-1} \binom{k}{\ell-1}}, \quad (10)$$

for  $\ell = 1, \dots, K-1$  and  $\gamma_{K-1} = \sum_{k=0}^{K-1} \theta_k$ . Note that the above solution may fail when  $\sum_{k=\ell-1}^{K-1} \theta_k (-1)^{\ell-1} \binom{k}{\ell-1} = 0$ . In this case, we can set  $\gamma_{K-\ell-1}$  sufficiently large so that equation (10) is still a good approximation. We also note that this case is rare because it implies that the  $K$ -order filter ignores all features from the  $\ell$ -hop neighbors. This proves that a  $K$ -layer GCNII can express the  $K$ -th order polynomial filter  $\left(\sum_{i=0}^k \theta_i \mathbf{L}^i\right) \mathbf{x}$  with arbitrary coefficients  $\theta$ .  $\square$

### A.2. Proof of Theorem 1

To prove Theorem 1, we need the following *Cheeger Inequality* (Chung, 2007) for lazy random walks.

**Lemma 1** ((Chung, 2007)). *Let  $\mathbf{p}_i^{(K)} = \left(\frac{\mathbf{I}_n + \tilde{\mathbf{A}}\tilde{\mathbf{D}}^{-1}}{2}\right)^K \mathbf{e}_i$  is the  $K$ -th transition probability vector from node  $i$  on connected self-looped graph  $\tilde{G}$ . Let  $\lambda_{\tilde{G}}$  denote the spectral gap of  $\tilde{G}$ . The  $j$ -th entry of  $\mathbf{p}_i^{(K)}$  can be bounded by*

$$\left| \mathbf{p}_i^{(K)}(j) - \frac{d_j + 1}{2m + n} \right| \leq \sqrt{\frac{d_j + 1}{d_i + 1}} \left(1 - \frac{\lambda_{\tilde{G}}^2}{2}\right)^K.$$

*Proof of Theorem 1.* Note that  $\mathbf{I}_n = \tilde{\mathbf{D}}^{-1/2}\tilde{\mathbf{D}}^{1/2}$ , we have

$$\begin{aligned}\mathbf{h}^{(K)} &= \left(\frac{\mathbf{I}_n + \tilde{\mathbf{D}}^{-1/2}\tilde{\mathbf{A}}\tilde{\mathbf{D}}^{-1/2}}{2}\right)^K \cdot \mathbf{x} \\ &= \left(\tilde{\mathbf{D}}^{-1/2} \left(\frac{\mathbf{I}_n + \tilde{\mathbf{A}}\tilde{\mathbf{D}}^{-1}}{2}\right) \tilde{\mathbf{D}}^{1/2}\right)^K \cdot \mathbf{x} \\ &= \tilde{\mathbf{D}}^{-1/2} \left(\frac{\mathbf{I}_n + \tilde{\mathbf{A}}\tilde{\mathbf{D}}^{-1}}{2}\right)^K \cdot \left(\tilde{\mathbf{D}}^{1/2}\mathbf{x}\right).\end{aligned}$$

We express  $\tilde{\mathbf{D}}^{1/2}\mathbf{x}$  as linear combination of standard basis:

$$\tilde{\mathbf{D}}^{1/2}\mathbf{x} = (\mathbf{D} + \mathbf{I}_n)^{1/2} \mathbf{x} = \sum_{i=1}^n \left(\mathbf{x}(i) \sqrt{d_i + 1}\right) \cdot \mathbf{e}_i,$$

it follows that

$$\begin{aligned}\mathbf{h}^{(K)} &= \tilde{\mathbf{D}}^{-1/2} \left(\frac{\mathbf{I}_n + \tilde{\mathbf{A}}\tilde{\mathbf{D}}^{-1}}{2}\right)^K \cdot \sum_{i=1}^n \left(\mathbf{x}(i) \sqrt{d_i + 1}\right) \cdot \mathbf{e}_i \\ &= \sum_{i=1}^n \mathbf{x}(i) \sqrt{d_i + 1} \cdot \tilde{\mathbf{D}}^{-1/2} \left(\frac{\mathbf{I}_n + \tilde{\mathbf{A}}\tilde{\mathbf{D}}^{-1}}{2}\right)^K \cdot \mathbf{e}_i.\end{aligned}$$

We note that  $\left(\frac{\mathbf{I}_n + \tilde{\mathbf{A}}\tilde{\mathbf{D}}^{-1}}{2}\right)^K \cdot \mathbf{e}_i = \mathbf{p}_i^{(K)}$  is the  $K$ -th transition probability vector of a random walk from node  $i$ . By Lemma 1, the  $j$ -th entry of  $\mathbf{p}_i^{(K)}$  can be bounded by

$$\left| \mathbf{p}_i^{(K)}(j) - \frac{d_j + 1}{2m + n} \right| \leq \sqrt{\frac{d_j + 1}{d_i + 1}} \left(1 - \frac{\lambda_G^2}{2}\right)^K,$$

or equivalently,

$$\mathbf{p}_i^{(K)}(j) = \frac{d_j + 1}{2m + n} \pm \sqrt{\frac{d_j + 1}{d_i + 1}} \left(1 - \frac{\lambda_G^2}{2}\right)^K.$$

Therefore, we can express the  $j$ -th entry of  $\mathbf{h}^{(K)}$  as

$$\begin{aligned} \mathbf{h}^{(K)}(j) &= \left( \sum_{i=1}^n \sqrt{d_i + 1} \mathbf{x}(i) \cdot \tilde{\mathbf{D}}^{-1/2} \mathbf{p}_i^{(K)} \right)(j) \\ &= \sum_{i=1}^n \sqrt{d_i + 1} \mathbf{x}(i) \frac{1}{\sqrt{d_j + 1}} \cdot \left( \frac{d_j + 1}{2m + n} \pm \sqrt{\frac{d_j + 1}{d_i + 1}} \left(1 - \frac{\lambda_G^2}{2}\right)^K \right) \\ &= \sum_{i=1}^n \frac{\sqrt{(d_j + 1)(d_i + 1)}}{2m + n} \mathbf{x}(i) \pm \sum_{i=1}^n \mathbf{x}(i) \left(1 - \frac{\lambda_G^2}{2}\right)^K. \end{aligned}$$

This proves

$$\mathbf{h}^{(K)} = \frac{\langle \tilde{\mathbf{D}}^{1/2} \mathbf{1}, \mathbf{x} \rangle}{2m + n} \tilde{\mathbf{D}}^{1/2} \mathbf{1} \pm \left( \sum_{i=1}^n x_i \right) \cdot \left(1 - \frac{\lambda_G^2}{2}\right)^K \cdot \mathbf{1},$$

and the Theorem follows.  $\square$

## B. Hyper-parameters details

Table 6 summarizes the training configuration of GCNII for semi-supervised.  $L_{2_d}$  and  $L_{2_c}$  denote the weight decay for dense layer and convolutional layer respectively. The searching hyper-parameters include numbers of layers, hidden dimension, dropout,  $\lambda$  and  $L_{2_c}$  regularization.

Table 7 summarizes the training configuration of all model for full-supervised. We use the full-supervised hyper-parameter setting from DropEdge for JKNet and IncepGCN on citation networks. For other cases, grid search was performed over the following search space: layers (4, 8, 16, 32, 64), dropedge (0.1, 0.2, 0.3, 0.4, 0.5, 0.6, 0.7, 0.8, 0.9),  $\alpha_\ell$  (0.1, 0.2, 0.3, 0.4, 0.5),  $\lambda$  (0.5, 1, 1.5),  $L_2$  regularization (1e-3, 5e-4, 1e-4, 5e-5, 1e-5, 5e-6, 1e-6).

Table 6. The hyper-parameters for Table 2.

| Dataset  | Hyper-parameters                                                                                                              |
|----------|-------------------------------------------------------------------------------------------------------------------------------|
| Cora     | layers: 64, $\alpha_\ell$ : 0.1, lr: 0.01, hidden: 64, $\lambda$ : 0.5, dropout: 0.6, $L_{2_c}$ : 0.01, $L_{2_d}$ : 0.0005    |
| Citeseer | layers: 32, $\alpha_\ell$ : 0.1, lr: 0.01, hidden: 256, $\lambda$ : 0.6, dropout: 0.7, $L_{2_c}$ : 0.01, $L_{2_d}$ : 0.0005   |
| Pubmed   | layers: 16, $\alpha_\ell$ : 0.1, lr: 0.01, hidden: 256, $\lambda$ : 0.4, dropout: 0.5, $L_{2_c}$ : 0.0005, $L_{2_d}$ : 0.0005 |

Table 7. The hyper-parameters for Table 5.

| Dataset | Method   | Hyper-parameters                                                                                     |
|---------|----------|------------------------------------------------------------------------------------------------------|
| Cora    | APPNP    | $\alpha$ : 0.1, $L_2$ : 0.0005, lr: 0.01, hidden: 64, dropout: 0.5                                   |
|         | GCNII    | layers: 64, $\alpha_\ell$ : 0.2, lr: 0.01, hidden: 64, $\lambda$ : 0.5, dropout: 0.5, $L_2$ : 0.0001 |
| Cite.   | APPNP    | $\alpha$ : 0.5, $L_2$ : 0.0005, lr: 0.01, hidden: 64, dropout: 0.5                                   |
|         | GCNII    | layers: 64, $\alpha_\ell$ : 0.5, lr: 0.01, hidden: 64, $\lambda$ : 0.5, dropout: 0.5, $L_2$ : 5e-6   |
| Pubm.   | APPNP    | $\alpha$ : 0.4, $L_2$ : 0.0001, lr: 0.01, hidden: 64, dropout: 0.5                                   |
|         | GCNII    | layers: 64, $\alpha_\ell$ : 0.1, lr: 0.01, hidden: 64, $\lambda$ : 0.5, dropout: 0.5, $L_2$ : 5e-6   |
| Cham.   | APPNP    | $\alpha$ : 0.1, $L_2$ : 1e-6, lr: 0.01, hidden: 64, dropout: 0.5                                     |
|         | JKNet    | layers: 32, lr: 0.01, hidden: 64, dropedge: 0.7, dropout: 0.5, $L_2$ : 0.0001                        |
|         | IncepGCN | layers: 8, lr: 0.01, hidden: 64, dropedge: 0.9, dropout: 0.5, $L_2$ : 0.0005                         |
|         | GCNII    | layers: 8, $\alpha_\ell$ : 0.2, lr: 0.01, hidden: 64, $\lambda$ : 1.5, dropout: 0.5, $L_2$ : 0.0005  |
| Corn.   | APPNP    | $\alpha$ : 0.5, $L_2$ : 0.005, lr: 0.01, hidden: 64, dropout: 0.5                                    |
|         | JKNet    | layers: 4, lr: 0.01, hidden: 64, dropedge: 0.5, dropout: 0.5, $L_2$ : 5e-5                           |
|         | IncepGCN | layers: 16, lr: 0.01, hidden: 64, dropedge: 0.7, dropout: 0.5, $L_2$ : 5e-5                          |
|         | GCNII    | layers: 16, $\alpha_\ell$ : 0.5, lr: 0.01, hidden: 64, $\lambda$ : 1, dropout: 0.5, $L_2$ : 0.001    |
| Texa.   | APPNP    | $\alpha$ : 0.5, $L_2$ : 0.001, lr: 0.01, hidden: 64, dropout: 0.5                                    |
|         | JKNet    | layers: 32, lr: 0.01, hidden: 64, dropedge: 0.8, dropout: 0.5, $L_2$ : 5e-5                          |
|         | IncepGCN | layers: 8, lr: 0.01, hidden: 64, dropedge: 0.8, dropout: 0.5, $L_2$ : 5e-6                           |
|         | GCNII    | layers: 32, $\alpha_\ell$ : 0.5, lr: 0.01, hidden: 64, $\lambda$ : 1.5, dropout: 0.5, $L_2$ : 0.0001 |
| Wisc.   | APPNP    | $\alpha$ : 0.5, $L_2$ : 0.005, lr: 0.01, hidden: 64, dropout: 0.5                                    |
|         | JKNet    | layers: 8, lr: 0.01, hidden: 64, dropedge: 0.8, dropout: 0.5, $L_2$ : 5e-5                           |
|         | IncepGCN | layers: 8, lr: 0.01, hidden: 64, dropedge: 0.7, dropout: 0.5, $L_2$ : 0.0001                         |
|         | GCNII    | layers: 16, $\alpha_\ell$ : 0.5, lr: 0.01, hidden: 64, $\lambda$ : 1, dropout: 0.5, $L_2$ : 0.0005   |
